# Supplementary material
Source: PubMed Central journal article supplement (PMC5794235)

## **High-sensitivity cardiac troponin and the risk stratification of patients with renal impairment presenting with suspected acute coronary syndrome**

Eve Miller-Hodges, MBChB, PhD, \*<sup>1,2</sup> Atul Anand, MBChB, \*<sup>1</sup> Anoop S V Shah, MBChB, PhD, <sup>1</sup>  
Andrew R Chapman, MBChB, <sup>1</sup> Peter Gallacher, MBChB,<sup>1,2</sup> Kuan Ken Lee, MBChB, <sup>1</sup>  
Tariq Farrah, MBChB,<sup>1,2</sup> Nynke Halbesma, MBChB,<sup>3</sup> James P Blackmur, MBChB, <sup>1</sup>  
David E. Newby, MBChB, PhD,<sup>1</sup> Nicholas L Mills, MBChB, PhD,<sup>1</sup> Neeraj Dhaun, MBChB, PhD<sup>1,2</sup>

*\* These authors contributed equally*

### *Risk stratification in ACS with renal impairment*

<sup>1</sup> University/British Heart Foundation Centre for Cardiovascular Science, University of Edinburgh,  
Queen's Medical Research Institute, 47 Little France Crescent, Edinburgh, EH16 4TJ, UK

<sup>2</sup> Department of Renal Medicine, Royal Infirmary of Edinburgh, 51 Little France Crescent,  
Edinburgh, EH16 4SA, UK

<sup>3</sup> Usher Institute of Population Health Sciences and Informatics, University of Edinburgh, Nine  
Edinburgh BioQuarter, 9 Little France Road Edinburgh EH16 4UX, UK

**Correspondence:** Dr Neeraj Dhaun  
Queen's Medical Research Institute  
47 Little France Crescent  
Edinburgh  
EH16 4TJ  
(+44)-131-242-6786  
[bean.dhaun@ed.ac.uk](mailto:bean.dhaun@ed.ac.uk)

**Pages:** 12

**Supplementary Tables:** 7

**Supplementary Figures:** 2

**Supplementary Table 1: Diagnostic Criteria**

|                                     |                                                                                                                                                                                                                                                                                                                                                                                                                                                                              |
|-------------------------------------|------------------------------------------------------------------------------------------------------------------------------------------------------------------------------------------------------------------------------------------------------------------------------------------------------------------------------------------------------------------------------------------------------------------------------------------------------------------------------|
| <i>Type 1 myocardial infarction</i> | Myocardial necrosis (any high-sensitivity cardiac troponin I concentration above sex-specific 99 <sup>th</sup> centile upper reference limit) with rise and or fall in hs-cTnI concentration where serial testing was available AND symptoms OR signs of myocardial ischemia                                                                                                                                                                                                 |
| <i>Type 2 myocardial infarction</i> | Myocardial necrosis (high-sensitivity cardiac troponin I concentration above sex-specific 99 <sup>th</sup> centile upper reference limit) with rise and or fall in high-sensitivity cardiac troponin I concentration where serial testing was available AND symptoms OR signs of myocardial ischemia AND evidence of increased oxygen demand (e.g. tachyarrhythmia, hypertrophy) or reduced supply (e.g. hypotension or anemia) in context of alternative clinical diagnosis |
| <i>Myocardial injury</i>            | Myocardial necrosis (high-sensitivity cardiac troponin I concentration above sex-specific 99 <sup>th</sup> centile upper reference limit) without symptoms OR signs of myocardial ischemia in context of alternative clinical diagnosis                                                                                                                                                                                                                                      |

**Supplementary Table 2**

|                                           | <b>eGFR &lt;15<br/>mL/min/1.73m<sup>2</sup><br/>(n=37)</b> | <b>eGFR 15-29<br/>mL/min/1.73m<sup>2</sup><br/>(n=102)</b> | <b>eGFR 30–59<br/>mL/min/1.73m<sup>2</sup><br/>(n=765)</b> | <b>eGFR ≥60<br/>mL/min/1.73m<sup>2</sup><br/>(n=3,822)</b> |
|-------------------------------------------|------------------------------------------------------------|------------------------------------------------------------|------------------------------------------------------------|------------------------------------------------------------|
| Age (years)                               | 68 (15)                                                    | 78 (11)                                                    | 77 (10)                                                    | 61 (16)                                                    |
| Male                                      | 26 (70%)                                                   | 55 (54%)                                                   | 353 (46%)                                                  | 2,236 (59%)                                                |
| <b>Renal Function</b>                     |                                                            |                                                            |                                                            |                                                            |
| Creatinine (μmol/L)                       | 528 (185)                                                  | 224 (49)                                                   | 123 (26)                                                   | 75 (13)                                                    |
| eGFR (mL/min/1.73m <sup>2</sup> )         | 10 (3)                                                     | 24 (4)                                                     | 47 (8)                                                     | 91 (18)                                                    |
| <b>Presenting complaint</b>               |                                                            |                                                            |                                                            |                                                            |
| Chest pain                                | 21 (57%)                                                   | 60 (59%)                                                   | 578 (76%)                                                  | 3,264 (85%)                                                |
| Dyspnea                                   | 4 (11%)                                                    | 22 (22%)                                                   | 75 (10%)                                                   | 164 (4%)                                                   |
| Palpitations                              | 1 (3%)                                                     | 1 (1%)                                                     | 18 (2%)                                                    | 106 (3%)                                                   |
| Syncope                                   | 3 (8%)                                                     | 9 (9%)                                                     | 49 (6%)                                                    | 112 (3%)                                                   |
| <b>Past medical history</b>               |                                                            |                                                            |                                                            |                                                            |
| Smoker                                    | 5 (14%)                                                    | 5 (5%)                                                     | 72 (9%)                                                    | 765 (20%)                                                  |
| Diabetes mellitus                         | 13 (35%)                                                   | 32 (31%)                                                   | 191 (25%)                                                  | 431 (11%)                                                  |
| Hyperlipidemia                            | 8 (22%)                                                    | 29 (28%)                                                   | 240 (31%)                                                  | 845 (22%)                                                  |
| Hypertension                              | 21 (57%)                                                   | 35 (34%)                                                   | 322 (42%)                                                  | 1,015 (27%)                                                |
| Ischemic heart disease                    | 14 (38%)                                                   | 44 (43%)                                                   | 324 (42%)                                                  | 1,009 (26%)                                                |
| Myocardial infarction                     | 8 (22%)                                                    | 27 (26%)                                                   | 164 (21%)                                                  | 597 (16%)                                                  |
| Stroke                                    | 3 (8%)                                                     | 17 (17%)                                                   | 89 (12%)                                                   | 228 (6%)                                                   |
| <b>Previous revascularization</b>         |                                                            |                                                            |                                                            |                                                            |
| Percutaneous intervention                 | 0 (0%)                                                     | 5 (5%)                                                     | 75 (10%)                                                   | 367 (10%)                                                  |
| Coronary artery bypass grafting           | 6 (16%)                                                    | 6 (6%)                                                     | 71 (9%)                                                    | 164 (4%)                                                   |
| <b>Admission drugs</b>                    |                                                            |                                                            |                                                            |                                                            |
| Aspirin                                   | 8 (22%)                                                    | 23 (23%)                                                   | 210 (27%)                                                  | 685 (18%)                                                  |
| Clopidogrel                               | 3 (8%)                                                     | 9 (9%)                                                     | 77 (10%)                                                   | 247 (6%)                                                   |
| Dual antiplatelet therapy                 | 2 (5%)                                                     | 1 (1%)                                                     | 27 (4%)                                                    | 127 (2%)                                                   |
| ACE-inhibitor or ARB                      | 4 (11%)                                                    | 21 (21%)                                                   | 227 (30%)                                                  | 709 (19%)                                                  |
| Beta-blocker                              | 6 (16%)                                                    | 21 (21%)                                                   | 180 (24%)                                                  | 565 (15%)                                                  |
| Statin                                    | 6 (16%)                                                    | 30 (29%)                                                   | 248 (32%)                                                  | 839 (22%)                                                  |
| Oral anticoagulant                        | 1 (3%)                                                     | 5 (5%)                                                     | 57 (7%)                                                    | 148 (4%)                                                   |
| <b>Cardiac troponin I concentration</b>   |                                                            |                                                            |                                                            |                                                            |
| At presentation (ng/L)                    | 49 (14–151)                                                | 41 (18–122)                                                | 14 (6–42)                                                  | 4 (2–11)                                                   |
| At peak (ng/L)                            | 242 (58–833)                                               | 54 (20–1491)                                               | 22 (7–115)                                                 | 6 (3–36)                                                   |
| <5ng/L at presentation                    | 2 (5%)                                                     | 4 (4%)                                                     | 151 (20%)                                                  | 2144 (56%)                                                 |
| >99 <sup>th</sup> centile at presentation | 23 (62%)                                                   | 65 (64%)                                                   | 272 (36%)                                                  | 578 (15%)                                                  |
| <b>Electrocardiogram</b>                  |                                                            |                                                            |                                                            |                                                            |
| Ischemic appearance                       | 13 (35%)                                                   | 30 (29%)                                                   | 185 (24%)                                                  | 588 (15%)                                                  |

|                                           |               |                |               |               |
|-------------------------------------------|---------------|----------------|---------------|---------------|
| ST-segment depression                     | 8 (22%)       | 13 (13%)       | 71 (9%)       | 210 (5%)      |
| Bundle branch block                       | 3 (8%)        | 17 (17%)       | 85 (11%)      | 173 (5%)      |
| T-wave inversion                          | 5 (14%)       | 12 (12%)       | 94 (12%)      | 404 (11%)     |
| <b><i>Hemodynamic parameters</i></b>      |               |                |               |               |
| Heart rate (beats per minute)             | 87 (27)       | 88 (27)        | 83 (28)       | 81 (22)       |
| Systolic BP (mmHg)                        | 144 (39)      | 127 (37)       | 136 (30)      | 139 (25)      |
| <b><i>Hospital utilization</i></b>        |               |                |               |               |
| Length of hospital stay (days)            | 2.7 (0.9–8.2) | 5.1 (1.2–11.8) | 1.3 (0.3–5.0) | 0.6 (0.2–1.8) |
| Discharged within 6 hours                 | 6 (16%)       | 2 (2%)         | 116 (15%)     | 1395 (36%)    |
| <b><i>Adjudicated index diagnosis</i></b> |               |                |               |               |
| Type 1 myocardial infarction              | 10 (27%)      | 29 (28%)       | 167 (22%)     | 445 (12%)     |
| Type 2 myocardial infarction              | 5 (14%)       | 10 (10%)       | 50 (7%)       | 108 (3%)      |
| Myocardial injury                         | 11 (30%)      | 27 (26%)       | 103 (13%)     | 160 (4%)      |

---

Values are number (%) or mean (SD) or median (interquartile range)

Abbreviations: eGFR = estimated glomerular filtration rate; ACE = angiotensin converting enzyme; ARB = angiotensin receptor blocker; BP = blood pressure

**Supplementary Table 3:** Performance of the risk stratification threshold (<5ng/L) for index type 1 myocardial infarction or readmission with type 1 myocardial infarction or cardiac death within 30 days, and index type 1 or type 2 myocardial infarction or readmission with type 1 or 2 myocardial infarction or cardiac death within 30 days

|                                                       | <b>eGFR <math>\geq 60</math> mL/min/1.73m<sup>2</sup></b><br>(n=3,822) |               | <b>eGFR &lt;60 mL/min/1.73m<sup>2</sup></b><br>(n=904) |               |
|-------------------------------------------------------|------------------------------------------------------------------------|---------------|--------------------------------------------------------|---------------|
| <b><i>Composite including only type 1 MI</i></b>      |                                                                        |               |                                                        |               |
|                                                       | Composite                                                              | Not Composite | Composite                                              | Not Composite |
| <5ng/L                                                | 7                                                                      | 2137          | 2                                                      | 155           |
| $\geq 5$ ng/L                                         | 451                                                                    | 1227          | 222                                                    | 525           |
| <b>Sensitivity</b>                                    | <b>98.4 (97.2–99.4)</b>                                                |               | <b>98.9 (97.5–99.9)</b>                                |               |
| Specificity                                           | 63.5 (61.9–65.1)                                                       |               | 22.8 (19.7–26.0)                                       |               |
| <b>Negative predictive value</b>                      | <b>99.7 (99.4–99.9)</b>                                                |               | <b>98.4 (96.0–99.7)</b>                                |               |
| Positive predictive value                             | 26.9 (24.8–29.0)                                                       |               | 29.7 (26.5–33.1)                                       |               |
| <b><i>Composite including type 1 or type 2 MI</i></b> |                                                                        |               |                                                        |               |
|                                                       | Composite                                                              | Not Composite | Composite                                              | Not Composite |
| <5ng/L                                                | 10                                                                     | 2134          | 2                                                      | 155           |
| $\geq 5$ ng/L                                         | 555                                                                    | 1123          | 285                                                    | 462           |
| <b>Sensitivity</b>                                    | <b>98.1 (97.0–99.2)</b>                                                |               | <b>99.1 (98.1–99.9)</b>                                |               |
| Specificity                                           | 65.5 (63.9–67.1)                                                       |               | 25.2 (21.8–28.6)                                       |               |
| <b>Negative predictive value</b>                      | <b>99.5 (99.2–99.8)</b>                                                |               | <b>98.4 (96.0–99.7)</b>                                |               |
| Positive predictive value                             | 33.1 (30.9–35.4)                                                       |               | 38.2 (34.7–41.7)                                       |               |

Data presented as 2x2 tables of patient numbers. Sensitivity, specificity, negative predictive value and positive predictive value are % (95% confidence intervals).

**Supplementary Table 4:** Diagnostic performance of the limit of detection (1.2ng/L) on presentation as a risk stratification threshold in patients with and without renal impairment

|                                                                              | <b>eGFR <math>\geq 60</math> mL/min/1.73m<sup>2</sup></b><br>(n=3,822) |                         | <b>eGFR <math>&lt; 60</math> mL/min/1.73m<sup>2</sup></b><br>(n=904) |                          |               |
|------------------------------------------------------------------------------|------------------------------------------------------------------------|-------------------------|----------------------------------------------------------------------|--------------------------|---------------|
| <b><i>Risk stratification threshold <math>&lt; 1.9</math> ng/L (LoD)</i></b> |                                                                        |                         |                                                                      |                          |               |
|                                                                              |                                                                        | Composite               | Not Composite                                                        | Composite                | Not Composite |
|                                                                              | $< 1.2$ ng/L                                                           | 3                       | 625                                                                  | 0                        | 19            |
|                                                                              | $\geq 1.2$ ng/L                                                        | 455                     | 2739                                                                 | 224                      | 661           |
| <b>Sensitivity</b>                                                           |                                                                        | <b>99.2 (98.4–99.9)</b> |                                                                      | <b>99.8 (99.1–100.0)</b> |               |
| <b>Specificity</b>                                                           |                                                                        | 18.6 (17.3–19.9)        |                                                                      | 2.9 (1.7–4.1)            |               |
| <b>Negative predictive value</b>                                             |                                                                        | <b>99.4 (98.7–99.9)</b> |                                                                      | <b>97.5 (90.5–100.0)</b> |               |
| <b>Positive predictive value</b>                                             |                                                                        | 14.3 (13.1–15.5)        |                                                                      | 25.3 (22.5–28.3)         |               |

Data presented as 2x2 tables of patient numbers. Sensitivity, specificity, negative predictive value and positive predictive value are % (95% confidence intervals). The composite primary outcome for risk stratification comprises index type 1 myocardial infarction, or readmission with type 1 myocardial infarction or cardiac death at 30 days.

**Supplementary Table 5:** Sub-group analysis of the diagnostic performance of the 99<sup>th</sup> centile for a diagnosis of type 1 myocardial infarction

|                                                | Type 1 MI (%) | TP  | TN   | FP  | FN | Sensitivity          | Specificity         | NPV                  | PPV                 |
|------------------------------------------------|---------------|-----|------|-----|----|----------------------|---------------------|----------------------|---------------------|
| <b>All Patients (n=4,726)</b>                  |               |     |      |     |    |                      |                     |                      |                     |
| eGFR $\geq$ 60ml/min/1.73m <sup>2</sup>        | 445 (12)      | 440 | 3112 | 265 | 5  | 98.8<br>(97.7-99.7)  | 92.1<br>(91.2-93.0) | 99.8<br>(99.6-99.9)  | 62.4<br>(58.8-65.9) |
| eGFR<60ml/min/1.73m <sup>2</sup>               | 206 (23)      | 203 | 495  | 203 | 3  | 98.3<br>(96.5-99.8)  | 70.9<br>(67.5-74.2) | 99.3<br>(98.4-99.8)  | 50.0<br>(45.2-54.8) |
| <b>Males (n=2,670)</b>                         |               |     |      |     |    |                      |                     |                      |                     |
| eGFR $\geq$ 60ml/min/1.73m <sup>2</sup>        | 284 (13)      | 280 | 1843 | 109 | 4  | 98.4<br>(97.0-99.7)  | 94.4<br>(93.4-95.4) | 99.8<br>(99.5-99.9)  | 71.9<br>(67.4-76.3) |
| eGFR<60ml/min/1.73m <sup>2</sup>               | 100 (23)      | 98  | 252  | 82  | 2  | 97.5<br>(94.5-99.8)  | 75.4<br>(70.7-79.9) | 99.0<br>(97.5-99.8)  | 54.4<br>(47.1-61.6) |
| <b>Females (n=2,056)</b>                       |               |     |      |     |    |                      |                     |                      |                     |
| eGFR $\geq$ 60ml/min/1.73m <sup>2</sup>        | 161 (10)      | 160 | 1269 | 156 | 1  | 99.1<br>(97.6-100.0) | 89.0<br>(87.4-90.6) | 99.9<br>(99.6-100.0) | 50.6<br>(45.1-56.1) |
| eGFR<60ml/min/1.73m <sup>2</sup>               | 106 (23)      | 105 | 243  | 121 | 1  | 98.6<br>(96.4-100.0) | 66.7<br>(61.9-71.5) | 99.4<br>(98.1-100.0) | 46.5<br>(40.0-53.0) |
| <b><math>\geq</math>65 years old (n=2,411)</b> |               |     |      |     |    |                      |                     |                      |                     |
| eGFR $\geq$ 60ml/min/1.73m <sup>2</sup>        | 247 (15)      | 243 | 1186 | 190 | 4  | 98.2<br>(96.5-99.6)  | 86.2<br>(84.3-88.0) | 99.6<br>(99.2-99.9)  | 56.1<br>(51.4-60.7) |
| eGFR<60ml/min/1.73m <sup>2</sup>               | 183 (23)      | 180 | 419  | 186 | 3  | 98.1<br>(96.1-99.7)  | 69.2<br>(65.5-72.9) | 99.2<br>(98.1-99.8)  | 49.2<br>(44.1-54.3) |
| <b>&lt;65 years old (n=2,315)</b>              |               |     |      |     |    |                      |                     |                      |                     |
| eGFR $\geq$ 60ml/min/1.73m <sup>2</sup>        | 198 (9)       | 197 | 1926 | 75  | 1  | 99.2<br>(98.0-100.0) | 96.2<br>(95.4-97.0) | 99.9<br>(99.8-100.0) | 72.3<br>(66.9-77.5) |
| eGFR<60ml/min/1.73m <sup>2</sup>               | 23 (20)       | 23  | 76   | 17  | 0  | 97.9<br>(92.1-100.0) | 81.4<br>(73.5-88.9) | 99.4<br>(97.5-100.0) | 57.3<br>(42.1-71.9) |

|                                                                                    |          |     |      |     |    |                     |                     |                     |                     |
|------------------------------------------------------------------------------------|----------|-----|------|-----|----|---------------------|---------------------|---------------------|---------------------|
| <b>Serial sampling on presentation (n=2,193)</b>                                   |          |     |      |     |    |                     |                     |                     |                     |
| eGFR $\geq$ 60ml/min/1.73m <sup>2</sup>                                            | 359 (21) | 263 | 1210 | 122 | 96 | 73.2<br>(68.6-77.7) | 90.8<br>(89.2-92.3) | 92.6<br>(91.1-94.0) | 68.3<br>(63.5-72.8) |
| eGFR<60ml/min/1.73m <sup>2</sup>                                                   | 159 (32) | 121 | 247  | 96  | 38 | 75.9<br>(69.3-82.4) | 71.9<br>(67.2-76.6) | 86.5<br>(82.4-90.2) | 55.7<br>(49.1-62.3) |
| <b>Serial sampling on repeat testing (n=2,193)</b>                                 |          |     |      |     |    |                     |                     |                     |                     |
| eGFR $\geq$ 60ml/min/1.73m <sup>2</sup>                                            | 359 (21) | 354 | 1174 | 158 | 5  | 98.5<br>(97.2-99.6) | 88.1<br>(86.4-89.8) | 99.5<br>(99.1-99.8) | 69.1<br>(65.0-73.0) |
| eGFR<60ml/min/1.73m <sup>2</sup>                                                   | 159 (32) | 156 | 236  | 107 | 3  | 97.8<br>(95.5-99.7) | 68.8<br>(63.8-73.6) | 98.5<br>(96.7-99.6) | 59.3<br>(53.3-65.1) |
| <b>&gt;99<sup>th</sup> centile and <math>\geq</math>20% delta change (n=2,193)</b> |          |     |      |     |    |                     |                     |                     |                     |
| eGFR $\geq$ 60ml/min/1.73m <sup>2</sup>                                            | 359 (21) | 294 | 1206 | 126 | 65 | 81.8<br>(77.8-85.7) | 90.5<br>(88.9-92.1) | 94.9<br>(93.6-96.0) | 70.0<br>(65.5-74.2) |
| eGFR<60ml/min/1.73m <sup>2</sup>                                                   | 159 (32) | 125 | 268  | 75  | 34 | 78.4<br>(72.0-84.7) | 78.1<br>(73.6-82.4) | 88.6<br>(84.8-91.9) | 62.4<br>(55.7-69.0) |

Diagnostic threshold >99<sup>th</sup> centile tested against an outcome of index type 1 myocardial infarction. TP = true positives; TN = true negatives; FP = false positives; FN = false negatives; NPV = negative predictive value; PPV = positive predictive value. Metrics provided are % (95% confidence intervals).



**Supplementary Table 6:** Performance of the diagnostic threshold (99<sup>th</sup> centile) for index type 1 myocardial infarction and index type 1 or type 2 myocardial infarction

|                                  | <b>eGFR ≥60mL/min/1.73m<sup>2</sup></b><br><i>(n=3,822)</i> |       | <b>eGFR &lt;60mL/min/1.73m<sup>2</sup></b><br><i>(n=904)</i> |       |
|----------------------------------|-------------------------------------------------------------|-------|--------------------------------------------------------------|-------|
| <i>Type 1 MI</i>                 |                                                             |       |                                                              |       |
|                                  | Type 1 MI                                                   | No MI | Type 1 MI                                                    | No MI |
| >99 <sup>th</sup> centile        | 440                                                         | 265   | 203                                                          | 203   |
| ≤99 <sup>th</sup> centile        | 5                                                           | 3112  | 3                                                            | 495   |
| Sensitivity                      | 98.8 (97.7–99.7)                                            |       | 98.3 (96.5–99.8)                                             |       |
| <b>Specificity</b>               | <b>92.1 (91.2–93.0)</b>                                     |       | <b>70.9 (67.5–74.2)</b>                                      |       |
| Negative predictive value        | 99.8 (99.6–99.9)                                            |       | 99.3 (98.4–99.8)                                             |       |
| <b>Positive predictive value</b> | <b>62.4 (58.8–65.9)</b>                                     |       | <b>50.0 (45.2–54.8)</b>                                      |       |
| <i>Type 1 or type 2 MI</i>       |                                                             |       |                                                              |       |
|                                  | Type 1 or 2 MI                                              | No MI | Type 1 or 2 MI                                               | No MI |
| >99 <sup>th</sup> centile        | 547                                                         | 158   | 267                                                          | 139   |
| ≤99 <sup>th</sup> centile        | 6                                                           | 3111  | 4                                                            | 494   |
| Sensitivity                      | 98.8 (97.9–99.6)                                            |       | 98.3 (96.8–99.6)                                             |       |
| <b>Specificity</b>               | <b>95.2 (94.4–95.9)</b>                                     |       | <b>78.0 (74.8–81.2)</b>                                      |       |
| Negative predictive value        | 99.8 (99.6–99.9)                                            |       | 99.1 (98.1–99.7)                                             |       |
| <b>Positive predictive value</b> | <b>77.5 (74.4–80.5)</b>                                     |       | <b>65.7 (61.0–70.3)</b>                                      |       |

Data presented as 2x2 tables of patient numbers. Sensitivity, specificity, negative predictive value and positive predictive value are % (95% confidence intervals).

**Supplementary Table 7:** Cox proportional hazard models for predictors of readmission with type 1 myocardial infarction or cardiac death up to 1 year (229 events)

| <b>Variable</b>                                     | <b>Model 1</b>         | <b>Model 2</b>         | <b>Model 3</b>         | <b>Model 4</b>         | <b>Model 5</b>         |
|-----------------------------------------------------|------------------------|------------------------|------------------------|------------------------|------------------------|
| Age <i>per</i> 10 year increase                     | 2.02***<br>(1.81-2.26) | 1.74***<br>(1.57-1.95) | 1.47***<br>(1.30-1.66) | 1.44***<br>(1.26-1.63) | 1.44***<br>(1.26-1.63) |
| Male sex                                            | 1.56**<br>(1.19-2.04)  | 1.39*<br>(1.06-1.82)   | 1.52**<br>(1.16-1.98)  | 1.58**<br>(1.18-2.11)  | 1.57**<br>(1.18-2.10)  |
| Cardiac troponin <i>per</i> doubling                |                        | 1.22***<br>(1.19-1.26) | 1.20***<br>(1.17-1.24) | 1.20***<br>(1.16-1.23) | 1.15***<br>(1.07-1.25) |
| eGFR <i>per</i> fall of 10mL/min/1.73m <sup>2</sup> |                        |                        | 1.22***<br>(1.15-1.29) | 1.23***<br>(1.15-1.30) | 1.28***<br>(1.15-1.41) |
| Previous IHD                                        |                        |                        |                        | 1.32<br>(1.00-1.75)    | 1.32<br>(1.00-1.75)    |
| Diabetes                                            |                        |                        |                        | 1.36<br>(0.99-1.87)    | 1.37<br>(1.00-1.88)    |
| Hypertension                                        |                        |                        |                        | 0.86<br>(0.65-1.14)    | 0.87<br>(0.66-1.16)    |
| Cardiac troponin:<br>eGFR interaction               |                        |                        |                        |                        | 1.00<br>(1.00-1.00)    |

No significant difference between Model 4 and Model 5 by ANOVA (p=0.31)

\*\*\*p<0.001; \*\*p<0.01; \*p<0.05

Supplementary Figure 1: Study CONSORT diagram

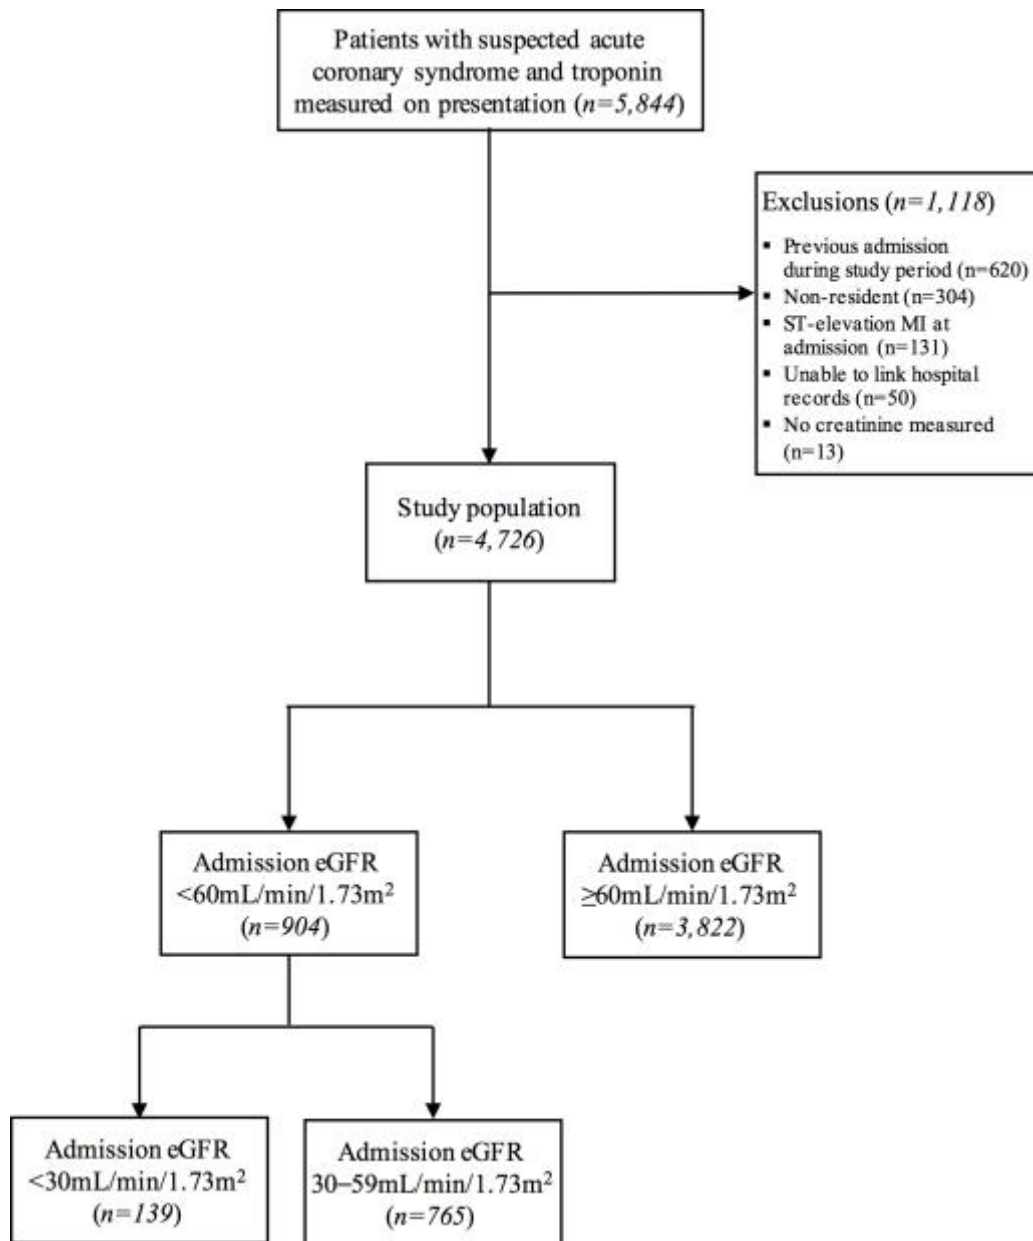

**Supplementary Figure 2:** Cox regression modelling of the relationship between estimated glomerular filtration rate and the risk of subsequent type 1 myocardial infarction or cardiac death

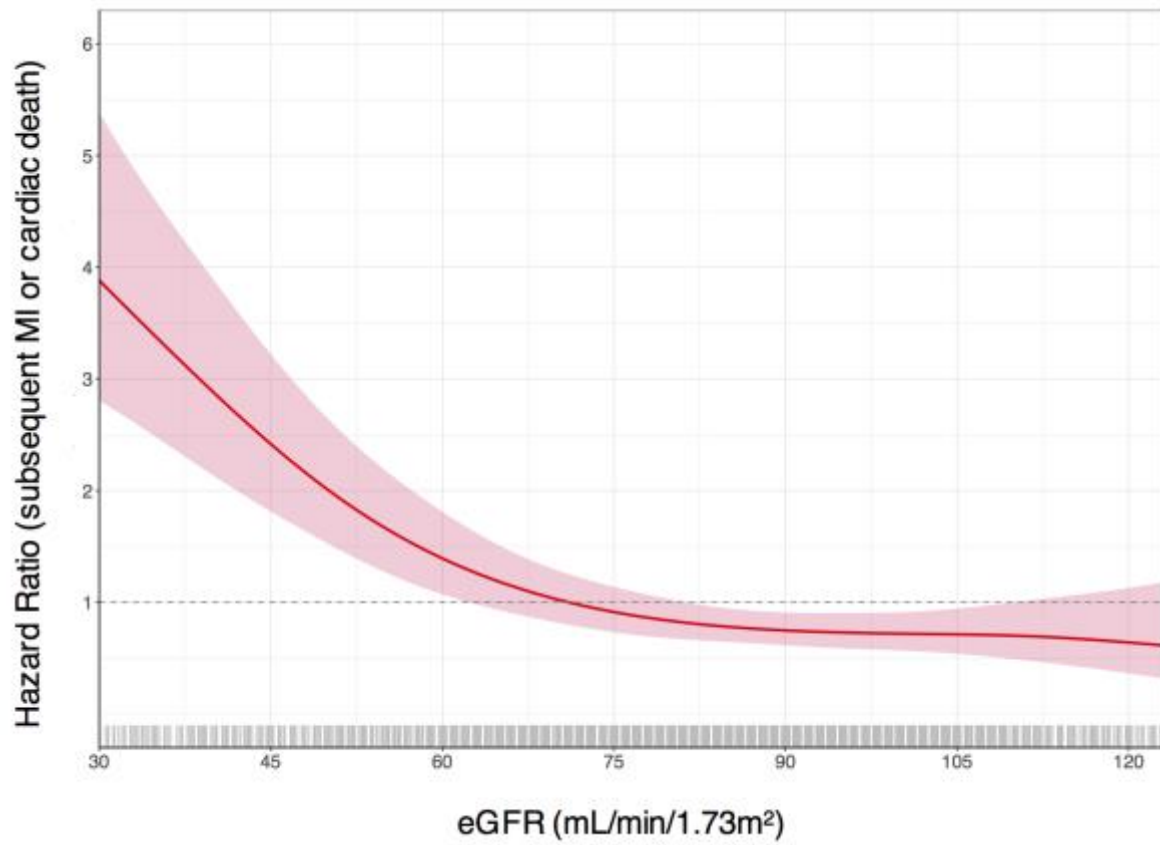

Supplement: cir-137-425-s001.pdf [file cir-137-425-s001.pdf]
